# Supplementary material
Source: PubMed Central journal article supplement (PMC6042088)
Supplement: pnas.1802188115.sapp.pdf [file pnas.1802188115.sapp.pdf]

Supplementary Information for

**Glycosylation-dependent galectin-receptor interactions promote *Chlamydia trachomatis* infection**

Agustin L. Lujan<sup>a,b</sup>, Diego O. Croci<sup>c,d,1</sup>, Julián A. Gambarte Tudela<sup>a,b,1</sup>, Antonella D. Losinno<sup>a,b</sup>, Alejandro J. Cagnoni<sup>e</sup>, Karina V. Mariño<sup>e</sup>, María T. Damiani<sup>a,b,2,3</sup> and Gabriel A. Rabinovich<sup>d,f,2,3</sup>

To whom correspondence should be addressed.

Email: [meteresadamiani@gmail.com](mailto:meteresadamiani@gmail.com) or [gabyrabi@gmail.com](mailto:gabyrabi@gmail.com)

**This PDF file includes:**

SI Methods  
Figures S1 to S2  
Tables S1 to S3  
Video S1 caption  
SI References

**Other supplementary materials for this manuscript include the following:**

Video S1

## SI Methods

### ***Cell culture, antibodies, recombinant galectins and reagents***

Primary antibodies used were: anti- $\beta$ -actin (Abcam), anti-MOMP and anti-OmcB generously provided by Ted Hackstadt (National Institutes of Health, USA) and rabbit anti-Gal1 polyclonal IgG (1.5  $\mu$ g/mL) generated as described (56). Neutralizing antibodies used were: anti-FGFR2 (R&D Systems), anti-PDGFR $\beta$  (R&D Systems), anti- $\beta_1$  integrin (R&D Systems) and anti- $\alpha_v\beta_3$  integrins (R&D Systems). Secondary antibodies used were: goat anti-rabbit Cy3-labeled IgG, goat anti-rabbit Alexa488-labeled IgG, goat anti-rabbit Alexa647-coupled IgG, goat anti-mouse HRP-conjugated IgG and goat anti-rabbit HRP-conjugated IgG (Jackson ImmunoResearch Laboratories). Propidium Iodide (PI) and DAPI were purchased from Molecular Probes (Life Technologies). Mowiol 4-88 reagent was from Calbiochem (Merck).

### ***Bacterial strains***

For bacterial propagation, HeLa cells were infected at a multiplicity of infection (MOI) of 20 and incubated for 48 h. Then, infected cells were lysed and EBs were purified on a density gradient as previously described (1). The purified EBs were suspended in 0.2 M sucrose, L-glutamine and phosphate buffer (SPG) (pH=7.2) and titrated by quantification of inclusion forming units (IFUs) using confocal microscopy and flow cytometry.

### ***Glycophenotype analysis***

HeLa cells were incubated with biotinylated lectins including Con A (5  $\mu$ g/mL), L-PHA (2  $\mu$ g/mL), E-PHA (2  $\mu$ g/mL), LEL (1  $\mu$ g/mL), SNA (5  $\mu$ g/mL), MAA (10  $\mu$ g/mL), PNA (10  $\mu$ g/mL), HPA (10  $\mu$ g/mL), Gal1 (10  $\mu$ g/mL), ECL (5  $\mu$ g/mL), AAL (10  $\mu$ g/mL) and UEA (10  $\mu$ g/mL) (all purchased from Vector Labs). Phycoerythrin (PE)-coupled streptavidin was purchased from Sigma.

### ***Gal1 binding assays***

Chlamydial EBs ( $1 \times 10^6$ ) were incubated with 0.3  $\mu$ M recombinant Gal1 for 30 min at 4°C (step 1). Then, bacteria were centrifuged for 45 min at 35,000 rpm at 4°C (step 2). Supernatants were discarded and pellets were washed with 100 mM lactose at 4°C (step 3) and centrifuged as described above (step 4). Eluate was separated and new EB pellets (EB1) were further washed with lactose (step 5) and centrifuged (step 6) to generate second pellets (EB2). The experimental procedure is depicted in Fig. S1.

### ***Transmission electron microscopy***

After fixation, 4% low melting agarose was added to detach cells which were immediately centrifuged at 3,200 rpm for 10 min at 30°C. Cell pellets were kept at 4°C for 3 h for agarose solidification. Each sample was post-fixed in 1% OsO<sub>4</sub> for 1 h at room temperature, dehydrated in a graded acetone series, and embedded in low-viscosity epoxy resin (Pelco International). Polymerization was performed for 48 h at 70°C. Ultrathin sections with interference color gray were cut by an ultramicrotome (Ultracut R Leica), mounted on grids, and stained with uranyl acetate and Reynold's lead citrate (Ted Pella Inc).

### ***Inclusion forming unit assay***

Plates were centrifuged for 15 min at 4°C at 1,500 rpm (binding step), then cells were washed three times with 500 µL cold PBS, and finally incubated for 48 h in 5% CO<sub>2</sub> at 37°C. At the end of the chlamydial developmental cycle (48 h pi), cells were collected and lysed in SPG medium. Cell lysates were centrifuged for 10 min at 500 x g to remove debris and progressive dilutions containing harvested EBs were inoculated onto new HeLa cells seeded on 24-well plates to titrate bacterial progeny. After 24 h, the number of inclusions generated by chlamydial progenies was assessed by flow cytometry or by confocal microscopy as described (2).

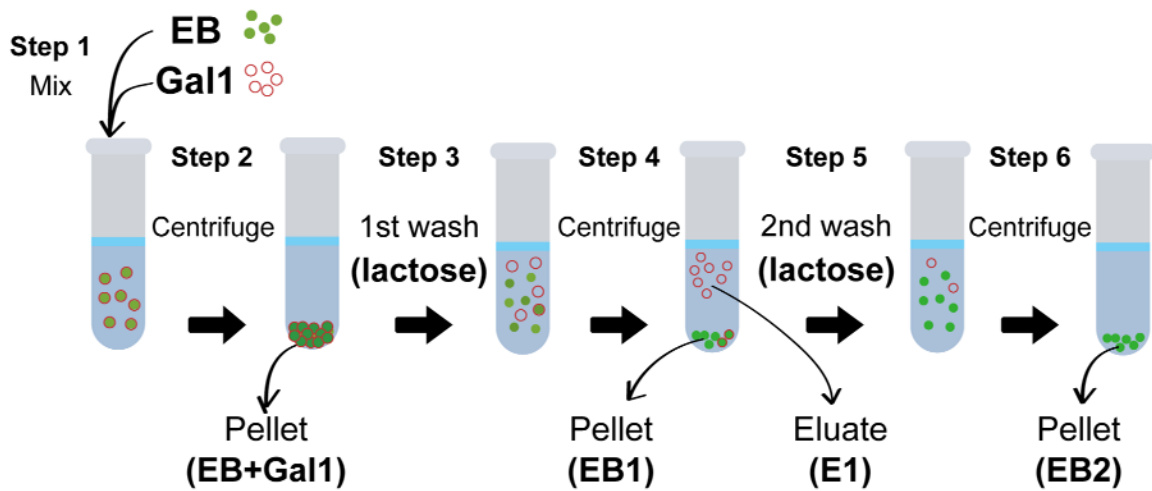

**Fig. S1. Experimental design: Analysis of carbohydrate-dependent binding of Gal1 to EBs.** Chlamydial EBs ( $1 \times 10^6$ ) were incubated with  $0.3 \mu\text{M}$  recombinant Gal1 for 30 min at  $4^\circ\text{C}$  (Step 1). Then, bacteria were centrifuged for 45 min at 35,000 rpm at  $4^\circ\text{C}$  (Step 2). Supernatants were discarded and pellets (EBs) were washed with 100 mM lactose at  $4^\circ\text{C}$  (Step 3) and centrifuged as described above (Step 4). Eluate (E1) was separated and new EB pellets (EB1) were further washed with lactose (Step 5) and centrifuged (Step 6) to generate new pellets (EB2). All bacterial pellets (EB, EB1 and EB2) and eluate (E1) were resolved on a 15% SDS-PAGE, transferred onto  $0.45 \mu\text{m}$  nitrocellulose membranes (GE Healthcare) and incubated overnight with anti-Gal1 (1:1000) or anti-MOMP (1:500) antibodies followed by goat anti-rabbit HRP-conjugated IgG (1:5000, 1 h,  $37^\circ\text{C}$ ). Protein bands were visualized using Pierce™ ECL Western blotting substrate in an ImageQuant LAS 4000.

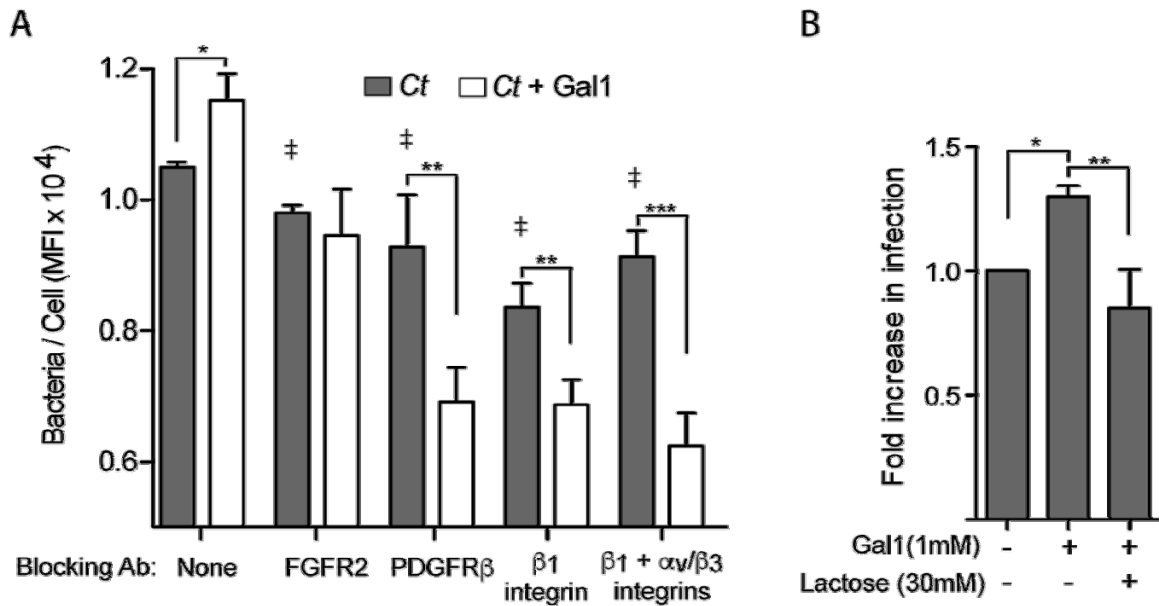

**Fig. S2. (A)** Contribution of FGFR2, PDGFR $\beta$ ,  $\beta_1$  integrin and  $\alpha_v\beta_3$  integrins to *Ct* infection. HeLa cells were infected with *Ct* (MOI 3) in the absence (gray bar) or presence (white bar) of Gal1. Quantification of bacteria per cell measured by MFI at 24 h pi in *Ct*-infected HeLa cells incubated with or without 1  $\mu$ M recombinant Gal1 in the absence (none) or presence of different neutralizing monoclonal antibodies. **(B)** Effect of lactose pre-treatment on Gal1-induced *Ct* binding to HeLa cells. **(A, B)** Data are the mean  $\pm$  SEM of three independent experiments (\* $p$ <0.05, \*\* $p$ <0.01, \*\*\* $p$ <0.001) (<sup>‡</sup>  $p$ <0.01 vs. *Ct* none).

**Table S1. Names, abbreviations and specificities of lectins used for glycophenotyping bacterial and host cell glycoproteins.**

|                                                                | <b>Abbreviation</b> | <b>Specificity</b>                                                                                                          |
|----------------------------------------------------------------|---------------------|-----------------------------------------------------------------------------------------------------------------------------|
| Concanavalin A                                                 | Con A               | Oligomannose type N-glycans                                                                                                 |
| <i>Erythrina cristagalli</i>                                   | ECL                 | Non sialylated LacNAc structures; Gal, GalNAc                                                                               |
| Peanut Agglutinin                                              | PNA                 | Gal $\beta$ 1-3GalNAc (asialo core 1 O-glycans)                                                                             |
| <i>Maackia amurensis</i>                                       | MAA                 | $\alpha$ 2-3-sialylated Gal                                                                                                 |
| <i>Sambucus nigra</i>                                          | SNA                 | High affinity for $\alpha$ 2-6 sialic acid and low affinity for $\alpha$ 2-3 sialic acid; Gal                               |
| <i>Ulex europaeus</i>                                          | UEA                 | Fuca1-2Gal                                                                                                                  |
| <i>Aleuria aurantia</i>                                        | AAL                 | Fuc $\alpha$ 1-3/ Fuc $\alpha$ 1-6-GlcNAc ; Fuc $\alpha$ 1-2 Gal                                                            |
| <i>Helix pomatia</i>                                           | HPA                 | GalNAc                                                                                                                      |
| <i>Lycopersicon esculentum</i>                                 | LEL                 | (Gal $\beta$ 1-4GlcNAc) <sub>3</sub>                                                                                        |
| <i>L-phytohemagglutinin</i><br>( <i>L-Phaseolus vulgaris</i> ) | L-PHA               | $\beta$ 1-6 branched complex N-glycans<br>Gal( $\beta$ 1-4)GlcNAc( $\beta$ 1-2); [Gal( $\beta$ 1-4)GlcNAc( $\beta$ 1-6)]Man |
| <i>E-phytohemagglutinin</i><br>( <i>E-Phaseolus vulgaris</i> ) | E-PHA               | Di-galactosylated and bisected N-glycans                                                                                    |

**Table S2. Lectin reactivity with *Chlamydia trachomatis* infectious form.** Lectin binding is indicated by (+) and the absence of binding by (-). Molecular weight (MW) of bacterial glycoproteins is indicated at the left side.

| Lectin:<br>MW(kDa) | Con A | L-PHA | ECL | SNA | HPA | PNA | Gal1 |
|--------------------|-------|-------|-----|-----|-----|-----|------|
| 170                | +     | -     | -   | -   | -   | -   | -    |
| 130                | +     | -     | -   | -   | -   | -   | -    |
|                    | +     | -     | -   | -   | -   | -   | +    |
| 100                | +     | -     | -   | -   | -   | -   | -    |
| 70                 | -     | -     | -   | +   | -   | -   | -    |
|                    | -     | -     | -   | +   | -   | -   | -    |
| 55                 | +     | +     | +   | +   | +   | -   | +    |
|                    | +     | -     | +   | -   | -   | -   | +    |
| 40                 | +     | +     | +   | +   | +   | -   | +    |
|                    | -     | -     | -   | -   | -   | -   | +    |
| 35                 | -     | -     | -   | -   | -   | -   | -    |
|                    | -     | -     | -   | -   | -   | -   | +    |
| 25                 | -     | -     | -   | +   | -   | -   | -    |
| 15                 | -     | -     | -   | -   | -   | -   | -    |
| 10                 | -     | -     | -   | -   | -   | -   | -    |

**Table S3. Glycosylated receptors involved in *Chlamydia trachomatis* recognition and entry.**

| <b>Gene</b>   | <b>Protein</b>                                                    | <b>N-linked (GlcNAc) asparagine position</b>                              | <b>Neutralizing antibodies</b>                                                                                   |
|---------------|-------------------------------------------------------------------|---------------------------------------------------------------------------|------------------------------------------------------------------------------------------------------------------|
| <i>ITGB1</i>  | <b>Integrin <math>\beta_1</math></b>                              | 50, 94, 97, 212, 269, 363, 403, 406, 411, 417, 481, 520, 584, 669.        | Human integrin $\beta_1$ /CD29 antibody. Monoclonal IgG <sub>1</sub> Clone#P5D2. Catalog number: MAB17781(R&D)   |
| <i>ITGB3</i>  | <b>Integrin <math>\beta_3</math></b>                              | 125, 346, 397, 478, 585, 680.                                             | Human integrin $\alpha_V\beta_3$ antibody. Monoclonal IgG <sub>1</sub> Clone#23C6. Catalog number: MAB3050 (R&D) |
| <i>ITGAV</i>  | <b>Integrin <math>\alpha_V</math></b>                             | 74, 290, 296, 488, 554, 615, 704, 835, 851, 874, 945, 973, 980.           |                                                                                                                  |
| <i>ITGA5</i>  | <b>Integrin <math>\alpha_5</math></b>                             | 84, 182, 297, 307, 316, 525, 530, 593, 609, 675, 712, 724, 771, 773, 868. | Human integrin $\alpha_5$ /CD49e antibody. Polyclonal IgG. Catalog number: AF1864 (R&D)                          |
| <i>FGFR2</i>  | <b>Fibroblast growth factor receptor 2</b>                        | 83, 123, 228, 241, 265, 297, 318, 331.                                    | Human FGFR2 antibody. Monoclonal IgG <sub>1</sub> Clone#98739. Catalog number: MAB6843 (R&D).                    |
| <i>PDGFRB</i> | <b>Platelet-derived growth factor receptor-<math>\beta</math></b> | 45, 89, 103, 215, 230, 292, 307, 354, 371, 468, 479.                      | Human PDGFR $\beta$ antibody. Polyclonal goat IgG. Catalog number: AF385 (R&D)                                   |



**Video S1. Confocal z planes of a HeLa cell infected with Ct for 18 h (MOI 1).** Gal1 was detected using a rabbit anti-Gal1 antibody followed by a goat anti-rabbit Alexa488-labeled IgG (green). DNA was stained with DAPI (blue).

## SI References

1. Scidmore MA (2005) Cultivation and laboratory maintenance of *Chlamydia trachomatis*. *Curr Prot Microbiol* (John Wiley & Sons, Inc., Hoboken, NJ, USA), Chapter 11:Unit 11A.1.
2. Capmany A, Damiani MT (2010) *Chlamydia trachomatis* intercepts Golgi-derived sphingolipids through a Rab14-mediated transport required for bacterial development and replication. *PLoS ONE* 5(11):e14084
